# Supplementary material for: Solid-state cis–trans isomerism in bis(oxamato)palladate(ii) complexes: synthesis, structural studies and catalytic activity
Source: Royal Society of Chemistry journal article supplement (doi:10.1039/c4ce00669k), 2014-05-27

SUPPORTING INFORMATION FOR

**Solid-state *cis-trans* isomerism in bis(oxamato)palladate(II) complexes: synthesis, structural studies and catalytic activity**

Francisco Ramón Fortea-Pérez,<sup>a</sup> Nadia Marino,<sup>b,c,\*</sup> Donatella Armentano,<sup>b</sup> Giovanni De Munno,<sup>b</sup> Miguel Julve,<sup>a</sup> and Salah-Eddine Stiriba<sup>a,\*</sup>

<sup>a</sup> Instituto de Ciencia Molecular (ICMol), Universitat de València, C/ Catedrático José Beltrán 2, 46980 Paterna (Valencia) , Spain. E-mail: stiriba@uv.es

<sup>b</sup> Dipartimento di Chimica e Tecnologie Chimiche, Università della Calabria, via P. Bucci 14/c, Rende (CS) 87036, Italy. E-mail: nadia.marino@unicat.it

<sup>c</sup> Department of Chemistry, Syracuse University, Syracuse, NY 13244-4100, United States.

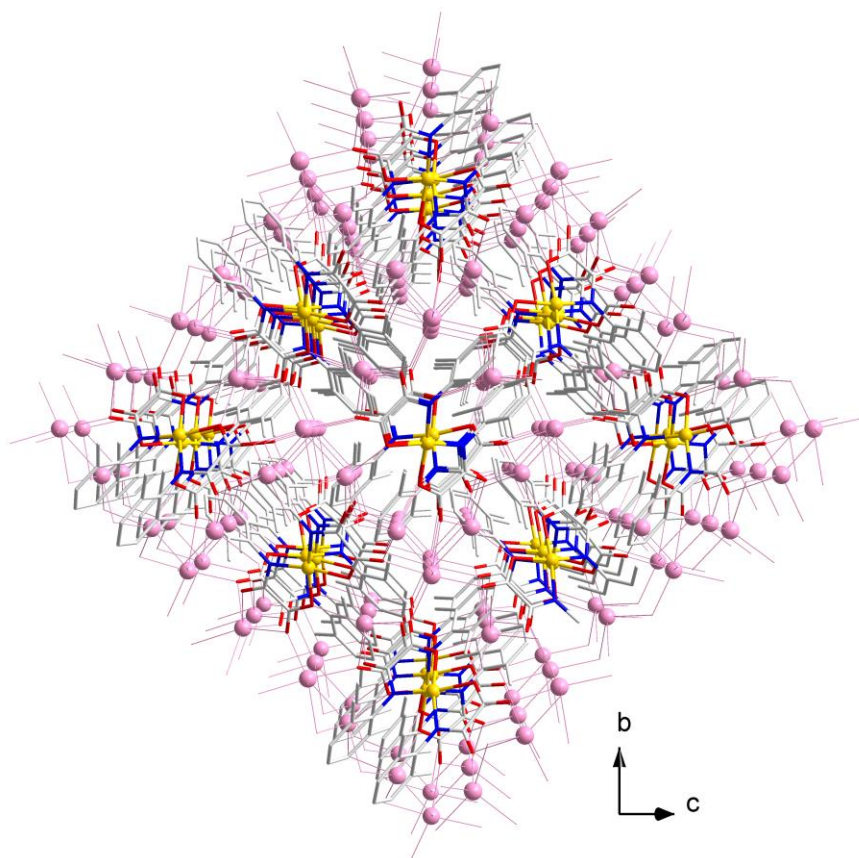

**Figure S1.** Perspective view of the crystal packing of **1b** along the crystallographic *a* axis.

## PXRD Profiles

### Compound 1a.

Exp.

Commander Sample ID (Coupled TwoTheta/Theta)

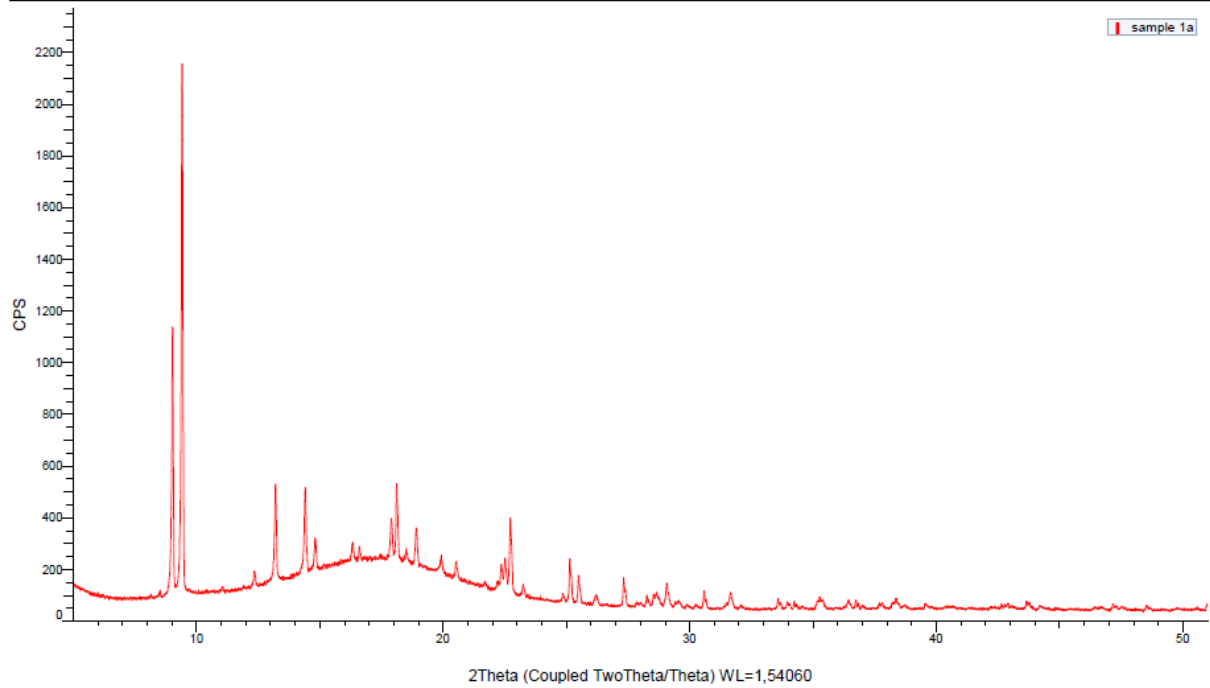

Simulated.

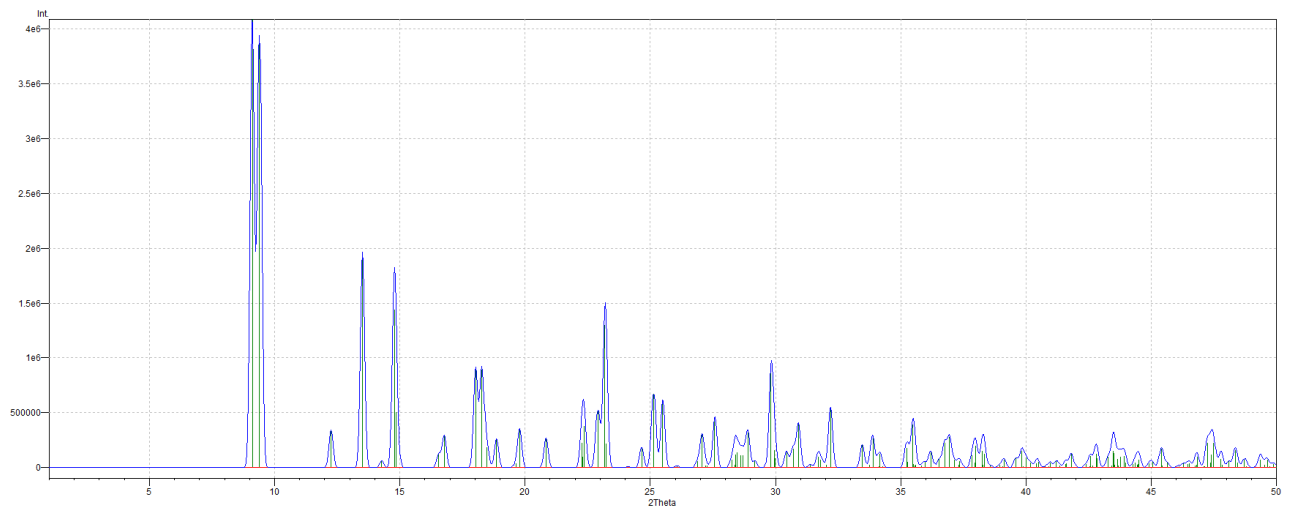

## Compound 1b.

Exp.

Commander Sample ID (Coupled TwoTheta/Theta)

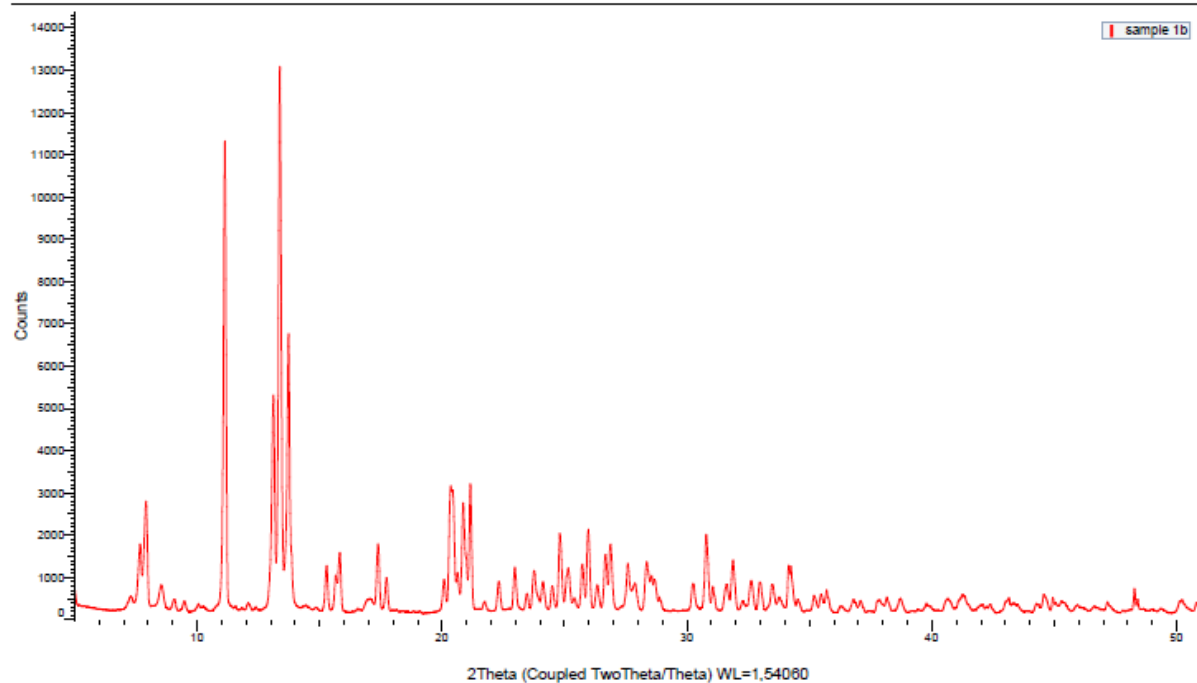

Simulated.

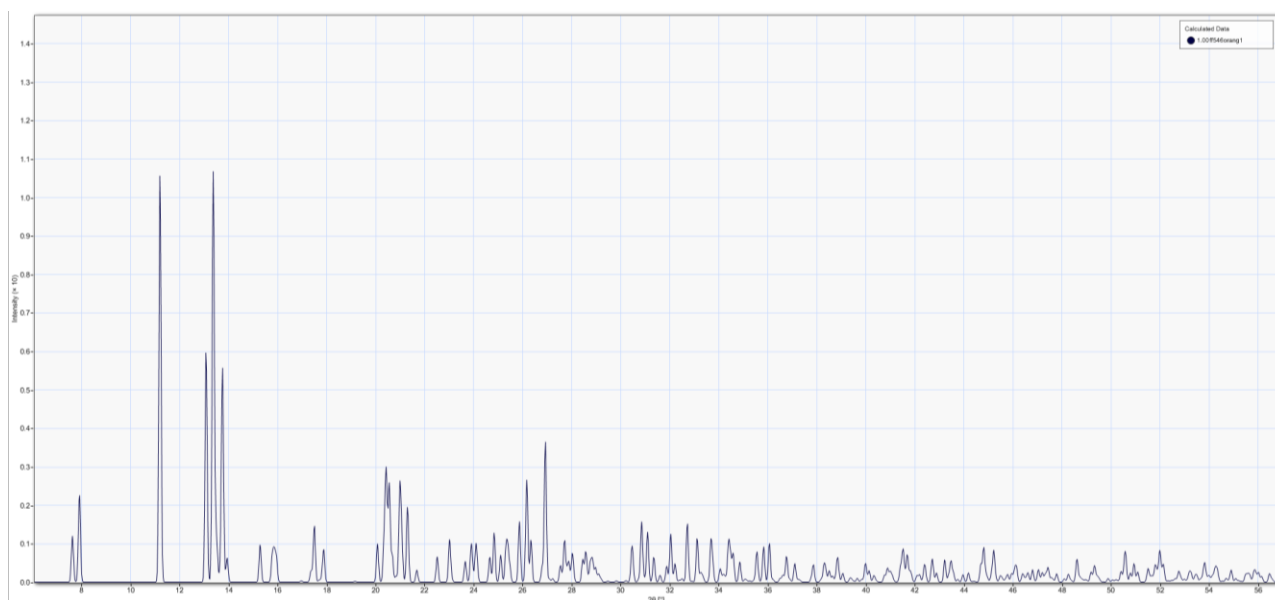

## Compound 2.

Exp.

Commander Sample ID (Coupled TwoTheta/Theta)

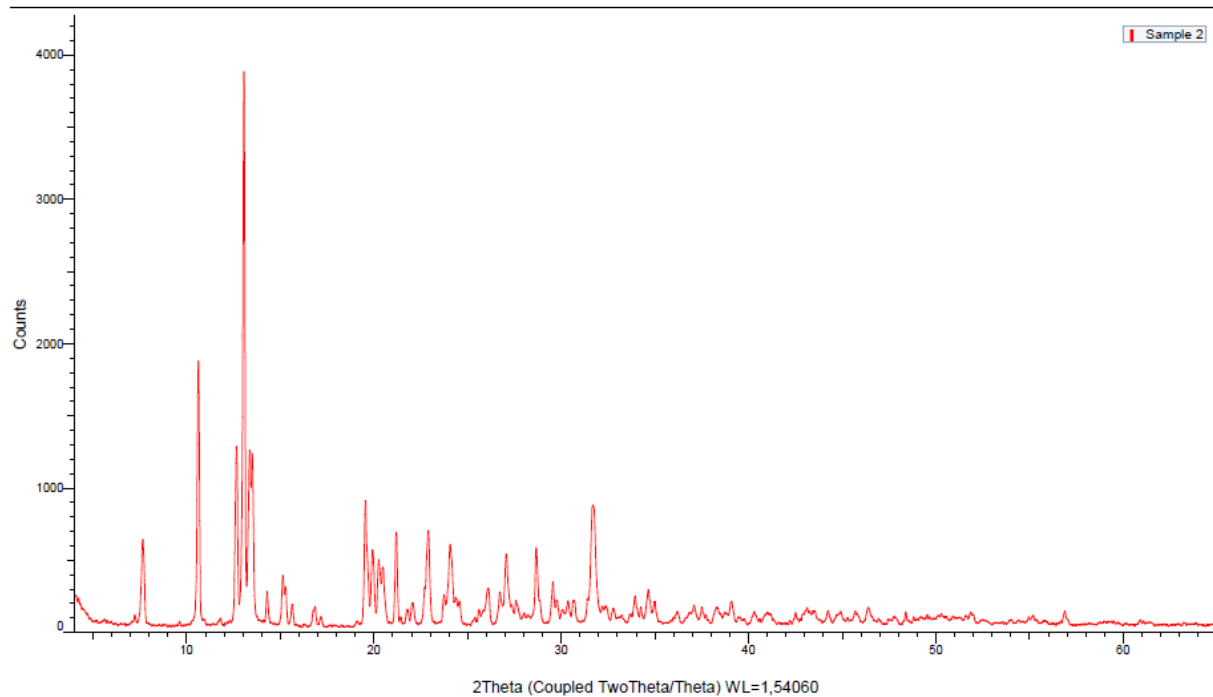

Simulated.

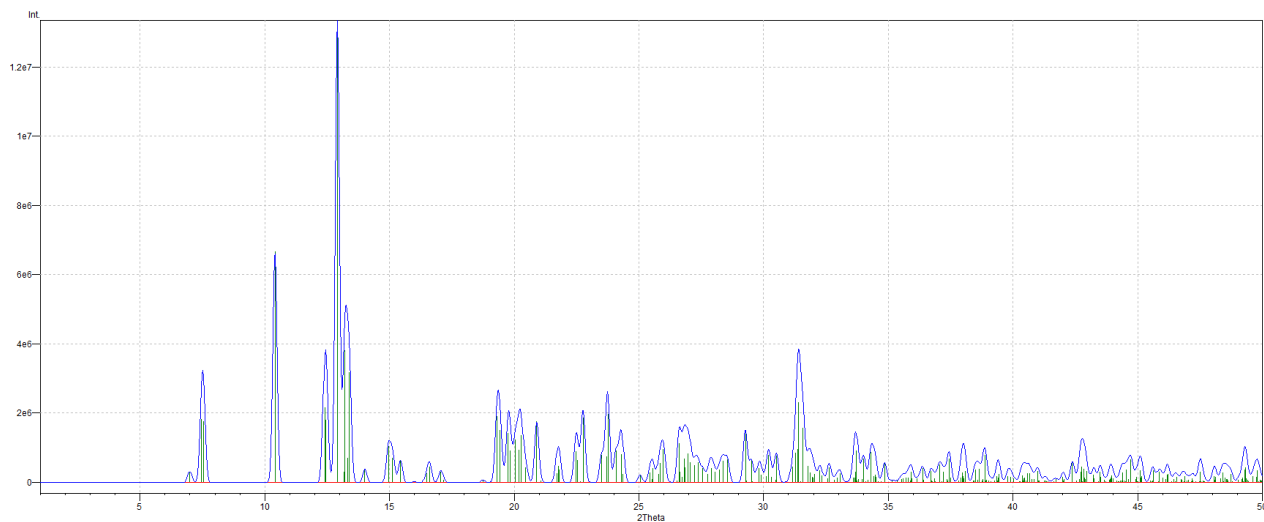

## Compound 3.

Exp.

Commander Sample ID (Coupled TwoTheta/Theta)

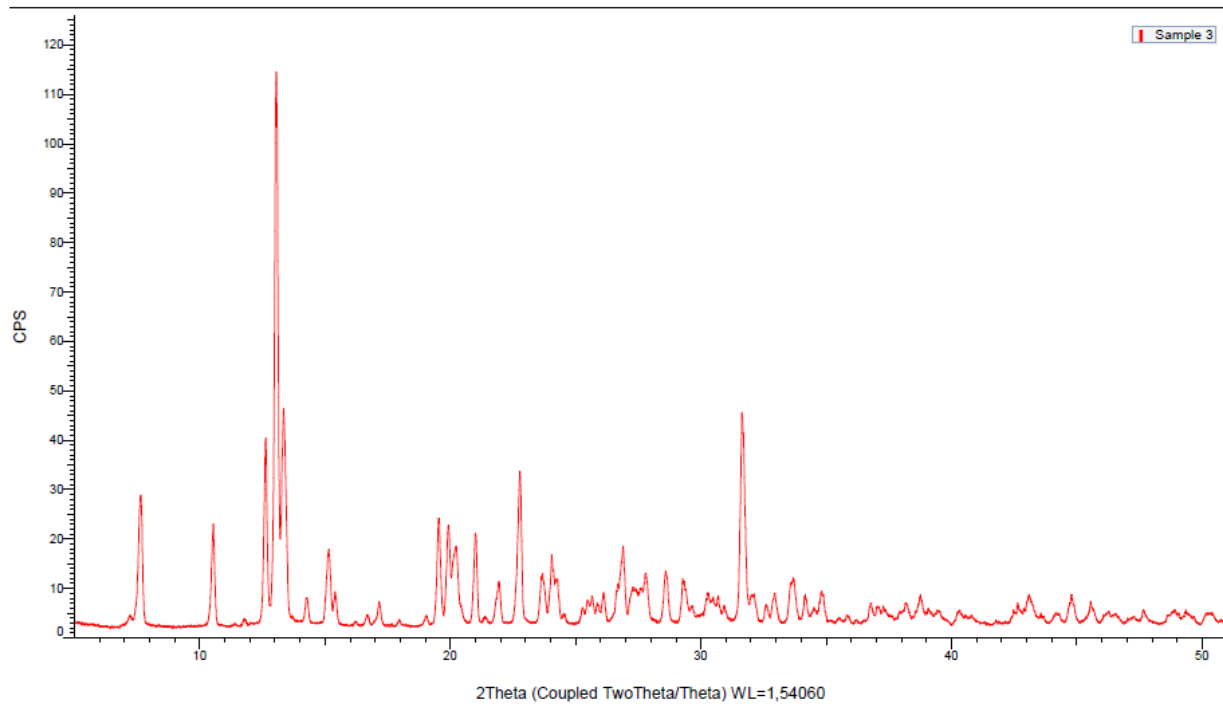

Simulated.

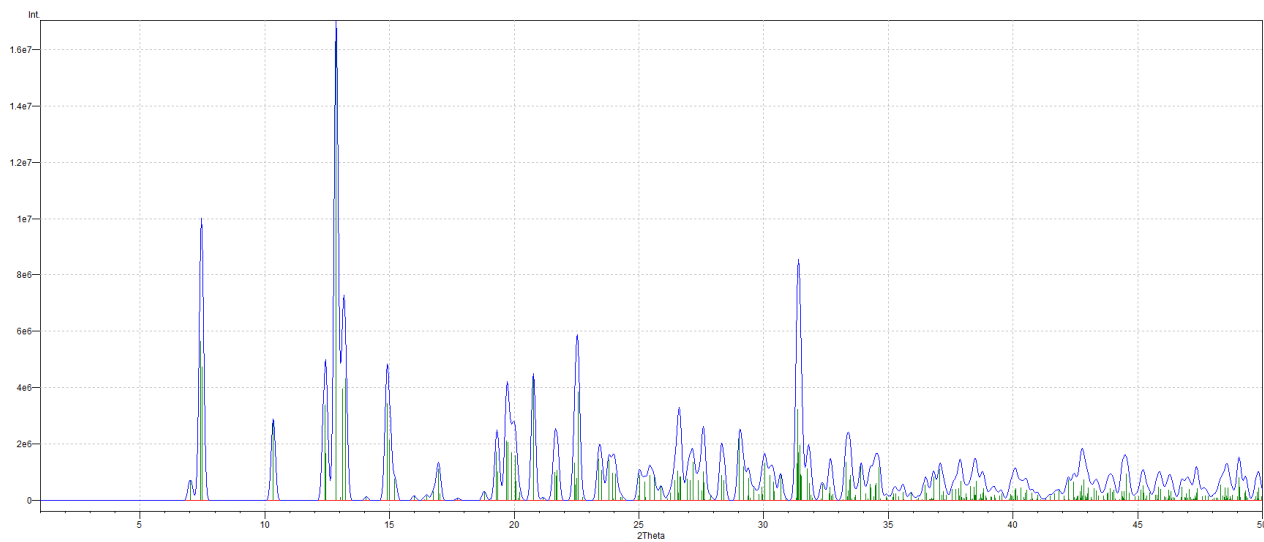

## Compound 4.

Exp.

Commander Sample ID (Coupled TwoTheta/Theta)

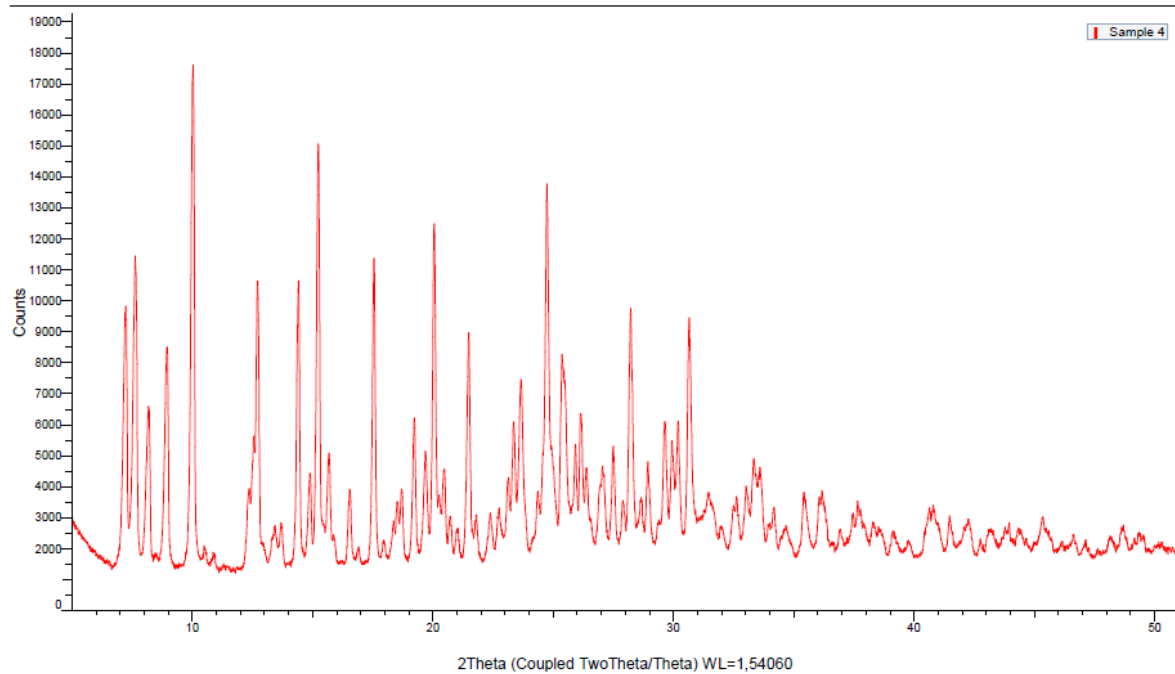

Simulated.

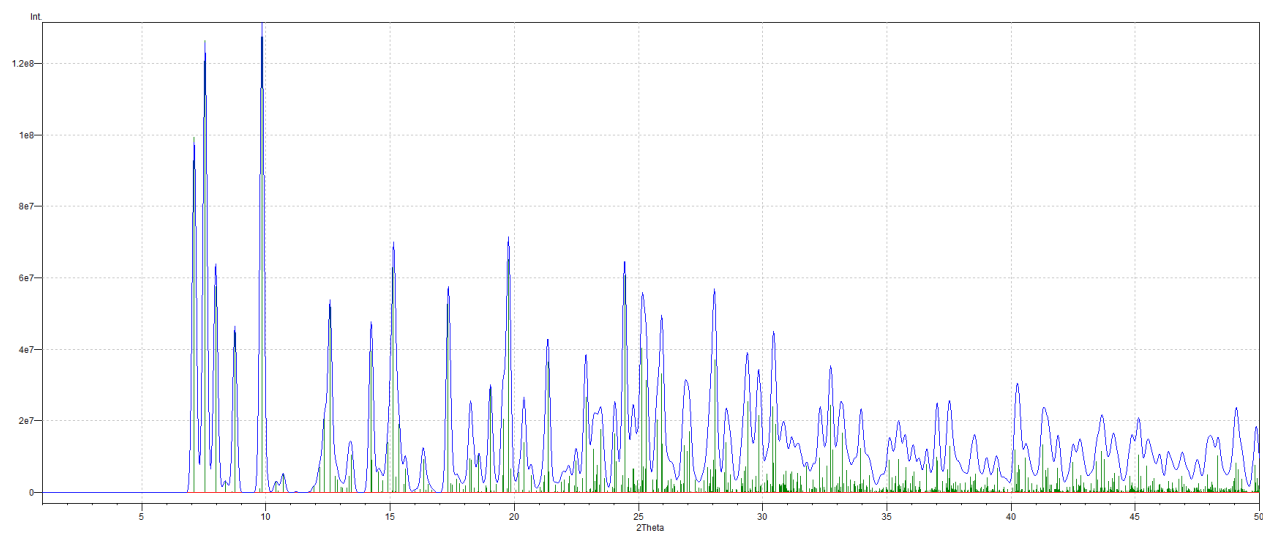

Supplement: c4ce00669k1.pdf [file c4ce00669k1.pdf]
